# Supplementary material for: Comprehensive structure–activity relationship (SAR) investigation of C-aryl glycoside derivatives for the development of SGLT1/SGLT2 dual inhibitors
Source: Royal Society of Chemistry journal article supplement (doi:10.1039/d1nj02510d), 2021-01-01
Supplement: d1nj02510d1.pdf [file d1nj02510d1.pdf]

## Supplementary information

### **Comprehensive structure-activity relationship (SAR) investigation of C-aryl glycoside derivatives for the development of SGLT1/SGLT2 dual inhibitors**

Yunting Xin<sup>a,b,‡</sup>, Shuhao Zhou<sup>a,b,‡</sup>, Huibin Wang<sup>a,c</sup>, Baichun Hu<sup>a,b,d</sup>, Zhigang Zhang<sup>a,b,d</sup>, Jian Wang<sup>a,b,d\*</sup>, Tiemin Sun<sup>a,b\*</sup>

<sup>a</sup> Key Laboratory of Structure-Based Drugs Design and Discovery of Ministry of Education, Shenyang Pharmaceutical University, Shenyang 110016, People's Republic of China

<sup>b</sup> School of Pharmaceutical Engineering, Shenyang Pharmaceutical University, Shenyang 110016, People's Republic of China

<sup>c</sup> School of Pharmacy, Shenyang Pharmaceutical University, Shenyang 110016, People's Republic of China

<sup>d</sup> Key Laboratory of Intelligent Drug Design and New Drug Discovery of Liaoning Province, Shenyang Pharmaceutical University, Shenyang 110016, People's Republic of China

‡ The authors contributed equally to this work.

\* Corresponding authors: Prof. Jian Wang, E-mail: [jianwang@sypu.edu.cn](mailto:jianwang@sypu.edu.cn); Tel: +86-24-52430227. Prof. Tiemin Sun, E-mail: [suntiem@126.com](mailto:suntiem@126.com); Tel: +86-24-43520225.

## Table of Contents

|                                                                                                                              |   |
|------------------------------------------------------------------------------------------------------------------------------|---|
| <b>Table S1</b> SMILES notation for the designed compounds.....                                                              | 1 |
| <b>Table S2</b> Docking results of all SGLT1 inhibitors.....                                                                 | 2 |
| <b>Table S3</b> Docking results of all SGLT2 inhibitors.....                                                                 | 4 |
| <b>Table S4</b> Docking results of SGLT2 inhibitors (marked drugs).....                                                      | 6 |
| <b>Table S5</b> Hydrogen bonds interactions of designed compounds with SGLT1 .....                                           | 7 |
| <b>Table S6</b> Hydrogen bonds interactions of designed compounds with SGLT2 .....                                           | 8 |
| <b>Fig. S1</b> Residual plots between the experimental and predicted values for SGLT1 (A) and SGLT2 (B) 3D-QSAR models. .... | 9 |

**Table S1** SMILES notation for the designed compounds

| Comp.         | SMILES                                                                                              |
|---------------|-----------------------------------------------------------------------------------------------------|
| C1            | <chem>C1C1=CC=C([C@H]2O[C@H](SCC(N)=O)[C@@H](O)[C@H](O)[C@H]2O)C=C1CC3=CC=C(OCC)C=C3</chem>         |
| C2            | <chem>C1C1=CC=C([C@H]2O[C@H](SCCCO)[C@@H](O)[C@H](O)[C@H]2O)C=C1CC3=CC=C(OCC)C=C3</chem>            |
| C3            | <chem>C1C1=CC=C([C@H]2O[C@H](SC[C@H](O)CO)[C@@H](O)[C@H](O)[C@H]2O)C=C1CC3=CC=C(OCC)C=C3</chem>     |
| C4            | <chem>C1C1=CC(OC)=C([C@H]2O[C@H](SC[C@H](O)CO)[C@@H](O)[C@H](O)[C@H]2O)C=C1CC3=CC=C(OCC)C=C3</chem> |
| C5            | <chem>O[C@@H]([C@H](O)[C@H]1O)[C@@H](SC[C@@H]2OC2)OC1C3=CC=C(Cl)C(CC4=CC=C(OCC)C=C4)=C3</chem>      |
| C6            | <chem>O[C@@H]([C@H](O)[C@H]1O)[C@@H](SC[C@@H]2OC2)OC1C3=C(OC)C=C(Cl)C(CC4=CC=C(OCC)C=C4)=C3</chem>  |
| Sotagliflozin | <chem>O[C@@H]([C@H](O)[C@H]1O)[C@@H](SC)OC1C2=CC=C(Cl)C(CC3=C=C(OCC)C=C3)=C2</chem>                 |

**Table S2** Docking results of all SGLT1 inhibitors

| <b>Comp.</b> | <b>IC<sub>50</sub><br/>(nM)</b> | <b>Exp.<br/>PIC<sub>50</sub></b> | <b>Docking Score<br/>(kcal/mol)</b> |
|--------------|---------------------------------|----------------------------------|-------------------------------------|
| A1           | 13137                           | 4.8815                           | -5.136                              |
| A2           | 12335                           | 4.9089                           | -5.462                              |
| A3           | 5314                            | 5.2746                           | -6.337                              |
| A4           | 4987                            | 5.3022                           | -6.563                              |
| A5           | 18679                           | 4.7282                           | -4.878                              |
| A6           | 81487                           | 4.889                            | -3.904                              |
| A7           | 24146                           | 4.6172                           | -4.618                              |
| A8           | 5902                            | 5.2290                           | -5.553                              |
| A9           | 158                             | 6.8013                           | -7.333                              |
| A10          | 126                             | 6.8996                           | -7.241                              |
| A11          | 3086                            | 5.5106                           | -5.696                              |
| A12          | 6281                            | 5.202                            | -5.210                              |
| A13          | 2050                            | 5.6882                           | -5.814                              |
| A14          | 546                             | 6.2628                           | -6.685                              |
| A15          | 4                               | 8.3979                           | -9.981                              |
| A16          | 5                               | 8.301                            | -10.380                             |
| A17          | 5                               | 8.301                            | -10.032                             |
| A18          | 53                              | 7.2757                           | -8.448                              |
| A19          | 58                              | 7.2366                           | -8.745                              |
| A20          | 32                              | 7.4949                           | -7.886                              |
| A21          | 33                              | 7.3468                           | -8.842                              |
| A22          | 48                              | 7.3188                           | -8.997                              |
| A23          | 49                              | 7.3098                           | -8.582                              |
| A24          | 37                              | 7.4318                           | -7.570                              |
| A25          | 96                              | 7.0177                           | -8.113                              |
| A26          | 34                              | 7.4685                           | -8.572                              |
| A27          | 112                             | 6.9508                           | -7.774                              |

---

|     |      |        |        |
|-----|------|--------|--------|
| A28 | 269  | 6.5702 | -7.082 |
| A29 | 165  | 6.7825 | -7.269 |
| A30 | 93   | 7.0315 | -8.291 |
| A31 | 221  | 6.6556 | -7.198 |
| A32 | 25   | 7.6021 | -7.662 |
| A33 | 287  | 6.5421 | -7.091 |
| A34 | 31   | 7.5086 | -7.679 |
| A35 | 36.2 | 7.4413 | -7.889 |

---

**Table S3** Docking results of all SGLT2 inhibitors

| <b>Comp.</b> | <b>IC<sub>50</sub><br/>(nM)</b> | <b>Exp.<br/>pIC<sub>50</sub></b> | <b>Docking Score<br/>(kcal/mol)</b> |
|--------------|---------------------------------|----------------------------------|-------------------------------------|
| B1           | 5.9                             | 8.2291                           | -8.718                              |
| B2           | 22.3                            | 7.6517                           | -8.764                              |
| B3           | 6.8                             | 8.1675                           | -8.802                              |
| B4           | 28.4                            | 7.6517                           | -8.010                              |
| B5           | 0.882                           | 9.0545                           | -9.191                              |
| B6           | 43.1                            | 7.3655                           | -8.023                              |
| B7           | 0.927                           | 9.0329                           | -9.228                              |
| B8           | 1.1                             | 8.9586                           | -8.586                              |
| B9           | 76.3                            | 7.1175                           | -7.912                              |
| B10          | 17.4                            | 7.7595                           | -8.143                              |
| B11          | 10.8                            | 7.9666                           | -8.593                              |
| B12          | 1.37                            | 8.8633                           | -8.882                              |
| B13          | 18.8                            | 7.7258                           | -8.209                              |
| B14          | 1.16                            | 8.9355                           | -8.742                              |
| B15          | 1.71                            | 8.7670                           | -9.250                              |
| B16          | 2.68                            | 8.5719                           | -8.331                              |
| B17          | 1.51                            | 8.8210                           | -8.304                              |
| B18          | 1.77                            | 8.8355                           | -8.366                              |
| B19          | 1.78                            | 8.821                            | -8.194                              |
| B20          | 1                               | 9                                | -9.494                              |
| B21          | 1                               | 9                                | -9.244                              |
| B22          | 2                               | 8.6990                           | -9.302                              |
| B23          | 1                               | 9                                | -8.377                              |
| B24          | 1                               | 9                                | -8.430                              |
| B25          | 1                               | 9                                | -8.630                              |
| B26          | 1                               | 9                                | -9.111                              |
| B27          | 3                               | 8.5229                           | -8.689                              |

---

|     |      |         |        |
|-----|------|---------|--------|
| B28 | 221  | 6.6556  | -7.697 |
| B29 | 2.2  | 8.6576  | -8.749 |
| B30 | 7.4  | 8.1308  | -8.382 |
| B31 | 0.88 | 9.0555  | -8.845 |
| B32 | 2.3  | 8.6383  | -8.583 |
| B33 | 2251 | 5.6476  | -6.047 |
| B34 | 2300 | 5.6383  | -6.999 |
| B35 | 5478 | 5.2614  | -6.093 |
| B36 | 1520 | 5.8182  | -7.051 |
| B37 | 3296 | 5.4820  | -6.138 |
| B38 | 32   | 7.4949  | -8.121 |
| B39 | 8.1  | 8.0915  | -8.102 |
| B40 | 17   | 7.7696  | -7.937 |
| B41 | 2.4  | 8.6198  | -8.197 |
| B42 | 24.6 | 8.1675  | -7.771 |
| B43 | 2.39 | 8.767   | -9.844 |
| B44 | 10   | 8.1291  | -8.911 |
| B45 | 3.9  | 8.57169 | -8.278 |
| B46 | 1.8  | 8.7447  | -8.188 |

---

**Table S4** Docking results of SGLT2 inhibitors (marked drugs)

---

| <b>Comp.</b>   | <b>Docking Score</b> | <b>Hydrogen bonds interaction</b> |
|----------------|----------------------|-----------------------------------|
| Sotagliflozin  | -8.188               | SER400 SER293                     |
| Dapagliflozin  | -8.425               | SER400 SER293 TYR150              |
| Empagliflozin  | -7.187               | SER393 SER396 LYS154 ASP294       |
| Ertugliflozin  | -5.772               | SER393 SER396 LYS154 ASP294 GLY77 |
| Luseogliflozin | -6.013               | SER393SER396 LYS154 ASP294 GLY77  |
| Ipragliflozin  | -7.191               | SER393 SER396 LYS154 GLY77        |
| tianagliflozin | -7.655               | SER400 SER293                     |
| Rongliflozin   | -7.587               | SER396 SER74 TYR150 LYS154 ASP194 |
| Hengliflozin   | -6.765               | SER393 SER396 LYS154 ASP294       |
| Bexagliflozin  | -8.087               | SER393 SER146 LYS154 ASP294 SER74 |

---



**Table S5** Hydrogen bonds interactions of designed compounds with SGLT1

| <b>Comp.</b>  | <b>Hydrogen Bonds interaction</b> |
|---------------|-----------------------------------|
| C1            | SER396 HIS83                      |
| C2            | ASP294 GLN295 ARG300              |
| C3            | SER396 LYS157                     |
| C4            | ASP204 SER396 ALA76               |
| C5            | SER396 HIS83 GLY82                |
| C6            | SER396 SER400 LYS157              |
| Sotagliflozin | ASP204 SER396                     |

**Table S6** Hydrogen bonds interactions of designed compounds with SGLT2

| <b>Comp.</b>  | <b>Hydrogen bonds interaction</b>  |
|---------------|------------------------------------|
| C1            | ASP294 SER400                      |
| C2            | ASP294 SER293 TYR150 SER400        |
| C3            | ASP294 SER400 TYR150 ALA73         |
| C4            | ASP294 SER396 SER393 LYS154 ASP201 |
| C5            | SER400 SER293 LYS154               |
| C6            | SER293 SER400 LYS154               |
| Sotagliflozin | SER400 SER293                      |

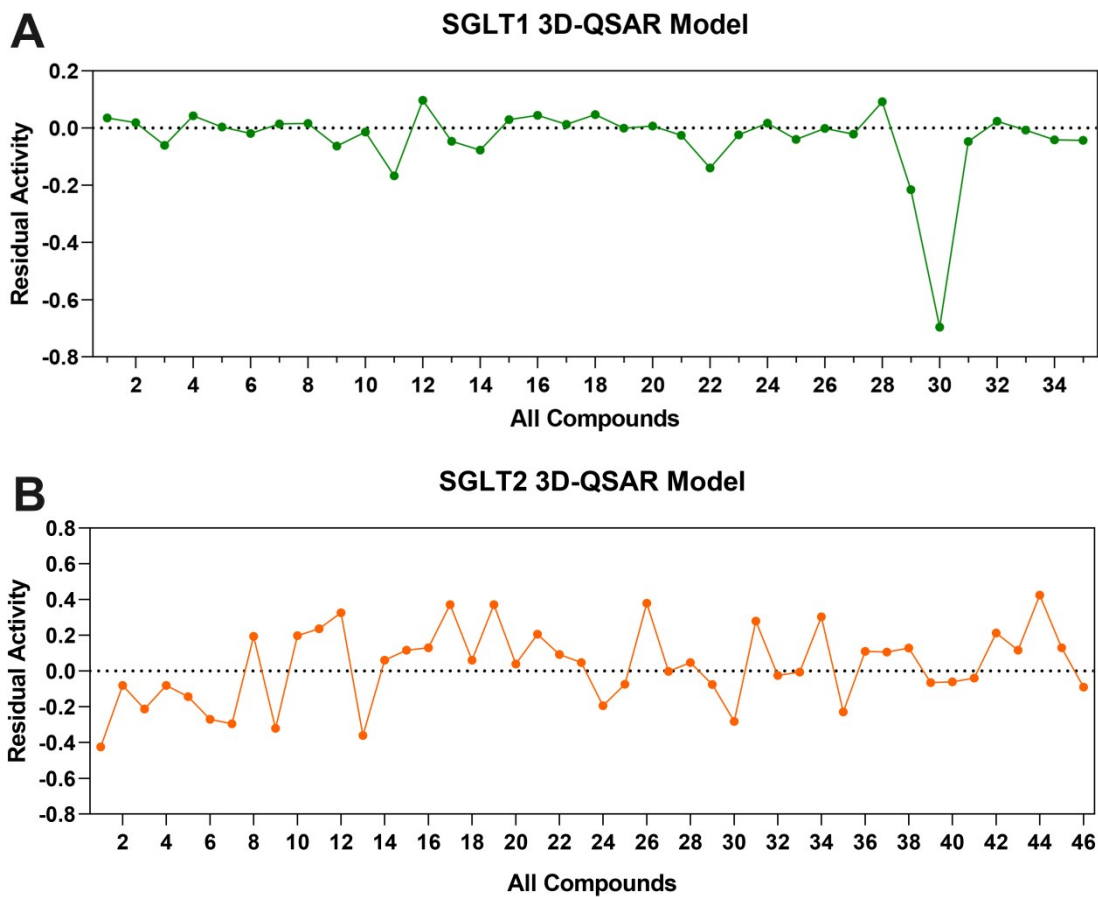

**Fig. S1** Residual plots between the experimental and predicted values for SGLT1 (A) and SGLT2 (B) 3D-QSAR models.
